# Supplementary material for: Data-driven reverse engineering of signaling pathways using ensembles of dynamic models
Source: PubMed Central journal article supplement (PMC5319798; doi:10.1371/journal.pcbi.1005379), 2017-02-06
Supplement: pcbi.1005379.s001.pdf [file pcbi.1005379.s001.pdf]

S1 Text: Ensemble time course trajectories  
obtained for training data  
Data-driven reverse engineering of signaling pathways using  
ensembles of dynamic models

David Henriques, Alejandro F. Villaverde, Miguel Rocha,  
Julio Saez-Rodriguez, Julio R. Banga

January 17, 2017

## Contents

|          |                                                            |          |
|----------|------------------------------------------------------------|----------|
| <b>1</b> | <b>Time-courses for training of different case-studies</b> | <b>3</b> |
| 1.1      | Case study 1a (MAPKp) . . . . .                            | 3        |
| 1.2      | Case study 1b (MAPKf) . . . . .                            | 4        |
| 1.3      | Case study 2 (SSP) . . . . .                               | 5        |
| 1.4      | Case study 3 (DREAMiS) . . . . .                           | 6        |
| 1.5      | Case study 4a (DREAMBT20) . . . . .                        | 7        |
| 1.6      | Case study 4b (DREAMBT549) . . . . .                       | 9        |
| 1.7      | Case study 4c (DREAMMCF7) . . . . .                        | 11       |
| 1.8      | Case study 4d (DREAMUACC812) . . . . .                     | 11       |

## List of Figures

|    |                                                                                                          |    |
|----|----------------------------------------------------------------------------------------------------------|----|
| 1  | Ensemble time course trajectories for the case study 1a (MAPKp) (training data) . . . . .                | 3  |
| 2  | Ensemble time course trajectories for the case study 1b (MAPKf) (training data) . . . . .                | 4  |
| 3  | Ensemble time course trajectories for the case study 2 (SSP) (training data) . . . . .                   | 5  |
| 4  | Ensemble time course trajectories for the case study 3 (DREAMiS) (training data) . . . . .               | 6  |
| 5  | Ensemble time course trajectories for the case study 4a (DREAMBT20) (training data, part 1) . . . . .    | 7  |
| 6  | Ensemble time course trajectories for the case study 4a (DREAMBT20) (training data, part 2) . . . . .    | 8  |
| 7  | Ensemble time course trajectories for the case study 4b (DREAMBT549) (training data, part 1) . . . . .   | 9  |
| 8  | Ensemble time course trajectories for the case study 4b (DREAMBT549) (training data, part 2) . . . . .   | 10 |
| 9  | Ensemble time course trajectories for the case study 4c (DREAMMCF7) (training data, part 1) . . . . .    | 11 |
| 10 | Ensemble time course trajectories for the case study 4c (DREAMMCF7) (training data, part 2) . . . . .    | 12 |
| 11 | Ensemble time course trajectories for the case study 4d (DREAMUACC812) (training data, part 1) . . . . . | 13 |
| 12 | Ensemble time course trajectories for the case study 4d (DREAMUACC812) (training data, part 2) . . . . . | 14 |

# 1 Time-courses for training of different case-studies

## 1.1 Case study 1a (MAPKp)

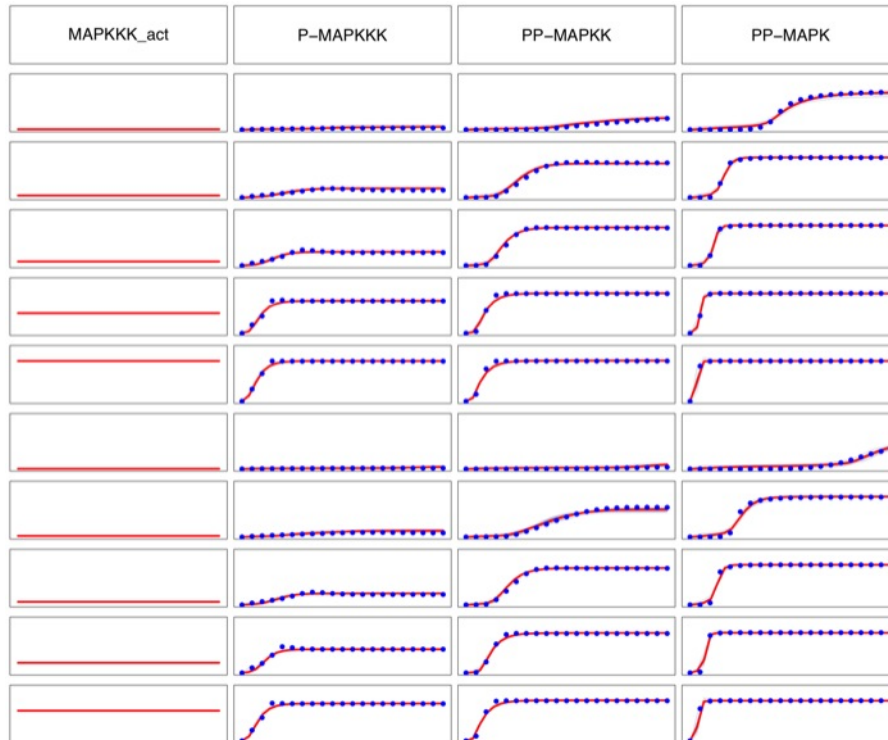

Figure 1: *Ensemble time course trajectories for the case study 1a (MAPKp) (training data)* The median in red is surrounded by the predicted non-symmetric 20% ,60% and 95%. Blue dots represent the pseudo-experimental data. Each row is an experiment and each column an observed signal.

## 1.2 Case study 1b (MAPKf)

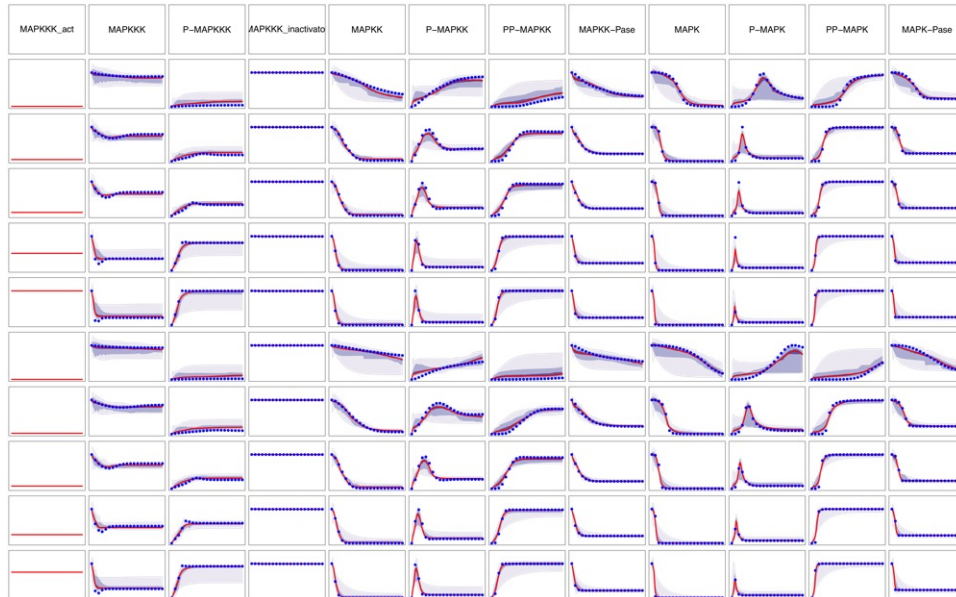

Figure 2: *Ensemble time course trajectories for the case study 1b (MAPKf) (training data)* The median in red is surrounded by the predicted non-symmetric 20% ,60% and 95%. Blue dots represent the pseudo-experimental data. Each row is an experiment and each column an observed signal.



### 1.3 Case study 2 (SSP)

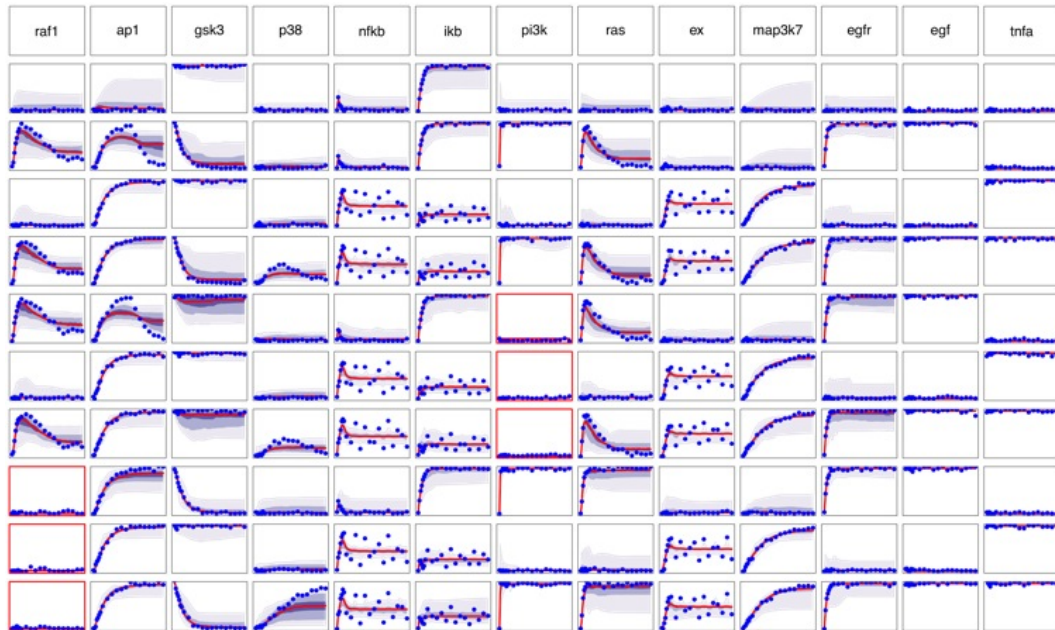

Figure 3: *Ensemble time course trajectories for the case study 2 (SSP) (training data)* The median in red is surrounded by the predicted non-symmetric 20%, 60% and 95%. Blue dots represent the pseudo-experimental data. Each row is an experiment and each column an observed signal.

## 1.4 Case study 3 (DREAMiS)

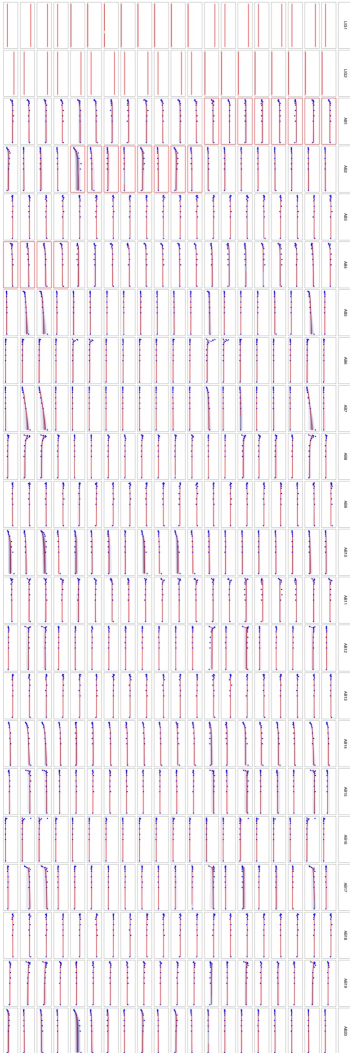

Figure 4: *Ensemble time course trajectories for the case study 2 (DREAMiS) (training data)*  
The median in red is surrounded by the predicted non-symmetric 20%, 60% and 95%. Blue dots represent the pseudo-experimental data. Each row is an experiment and each column an observed signal. Inhibited signals are surrounded by a red frame.

## 1.5 Case study 4a (DREAMBT20)

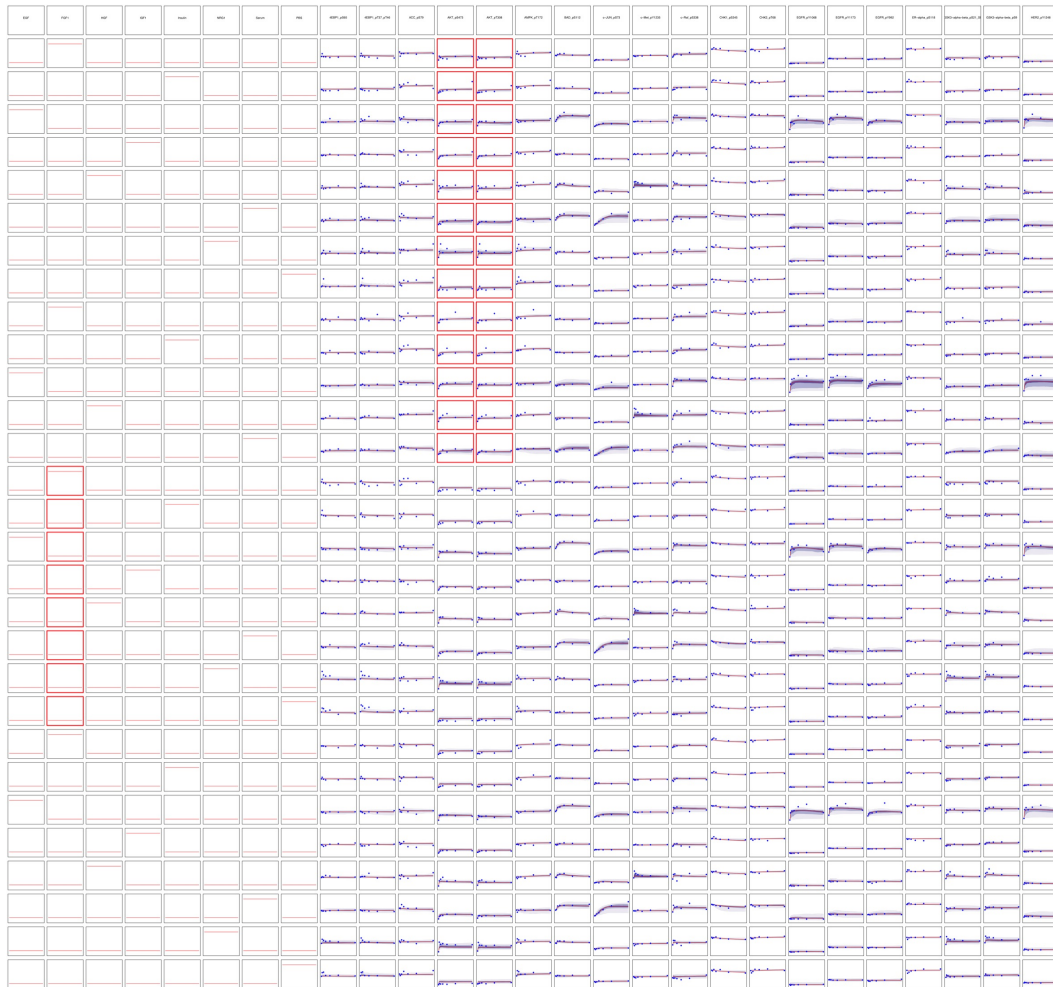

Figure 5: *Ensemble time course trajectories for the case study 4a (DREAMBT20) (training data, part 1)* The median in red is surrounded by the predicted non-symmetric 20% ,60% and 95%. Blue dots represent the experimental data. Each row is an experiment and each column an observed signal or stimuli. Inhibited signals are surrounded by a red frame and data for these experiments/signals combinations.

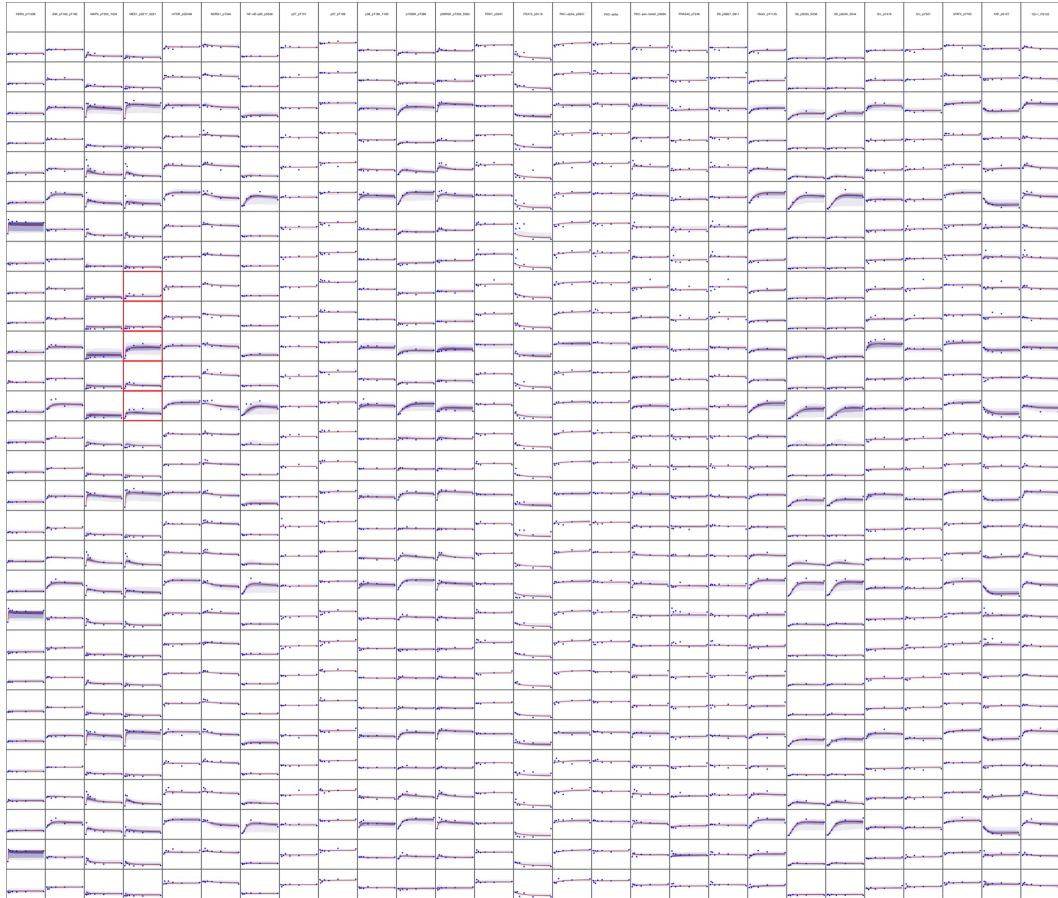

Figure 6: *Ensemble time course trajectories for the case study 4a (DREAMBT20) (training data, part 2)* The median in red is surrounded by the predicted non-symmetric 20% ,60% and 95%. Blue dots represent the experimental data. Each row is an experiment and each column an observed signal or stimuli. Inhibited signals are surrounded by a red frame and data for these experiments/signals combinations.

## 1.6 Case study 4b (DREAMBT549)

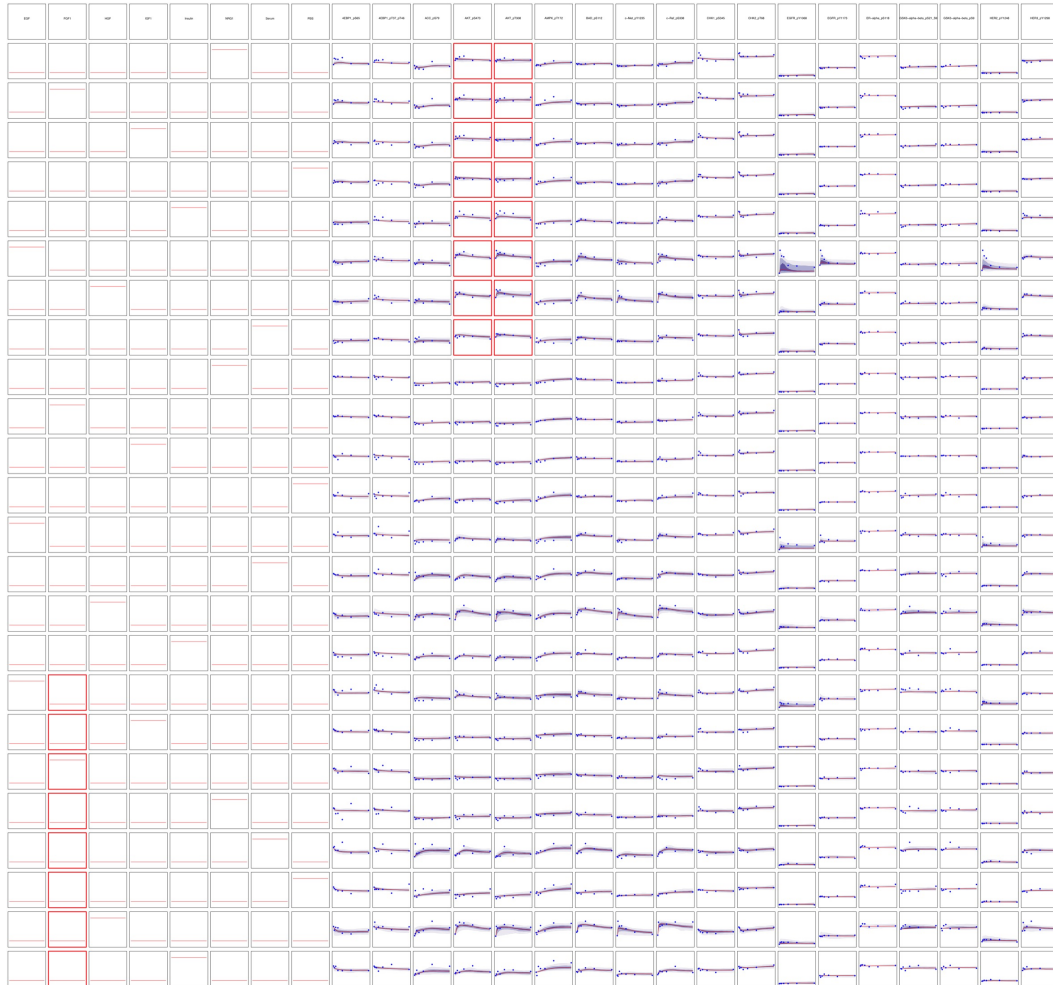

Figure 7: *Ensemble time course trajectories for the case study 4b (DREAMBT549) (training data, part 1)* The median in red is surrounded by the predicted non-symmetric 20% ,60% and 95%. Blue dots represent the experimental data. Each row is an experiment and each column an observed signal or stimuli. Inhibited signals are surrounded by a red frame and data for these experiments/signals combinations.

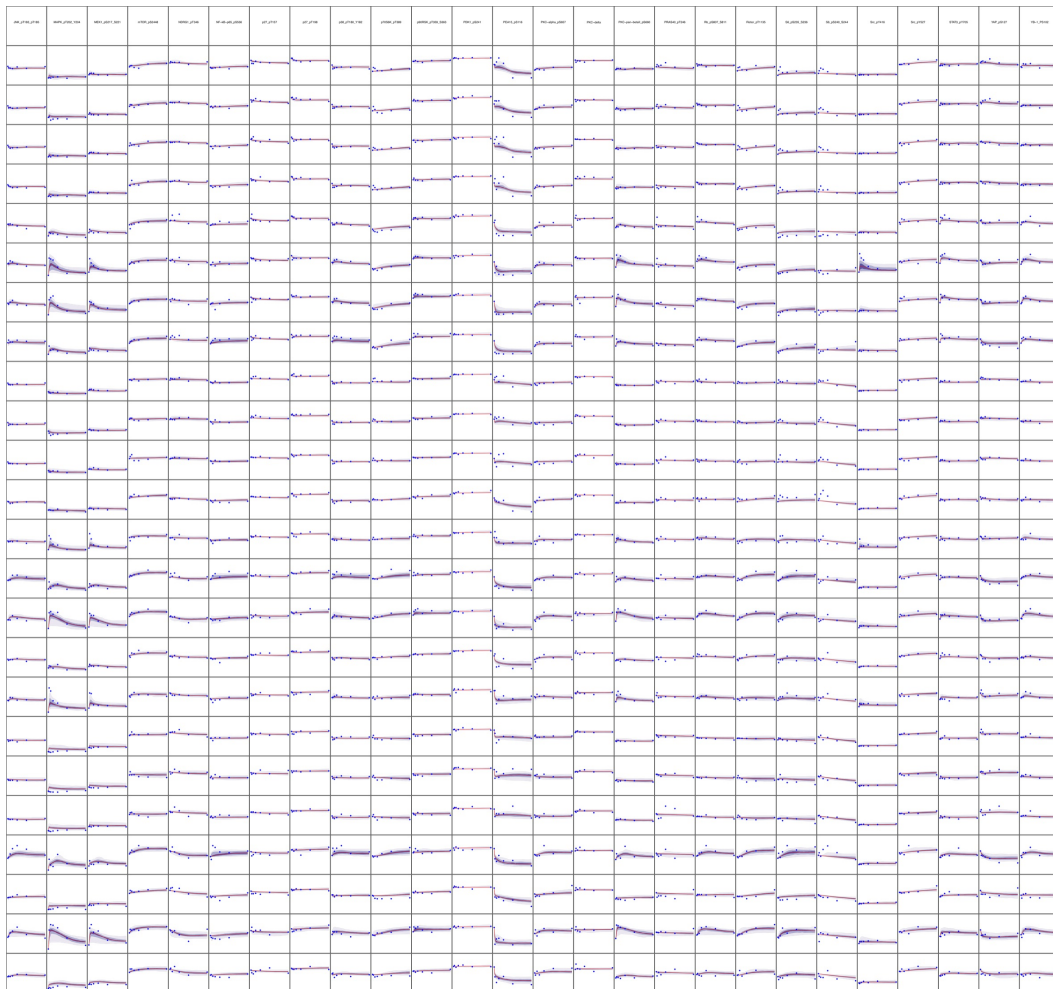

Figure 8: *Ensemble time course trajectories for the case study 4b (DREAMBT549) (training data, part 2)* The median in red is surrounded by the predicted non-symmetric 20% ,60% and 95%. Blue dots represent the experimental data. Each row is an experiment and each column an observed signal or stimuli. Inhibited signals are surrounded by a red frame and data for these experiments/signals combinations.



## 1.7 Case study 4c (DREAMMCF7)

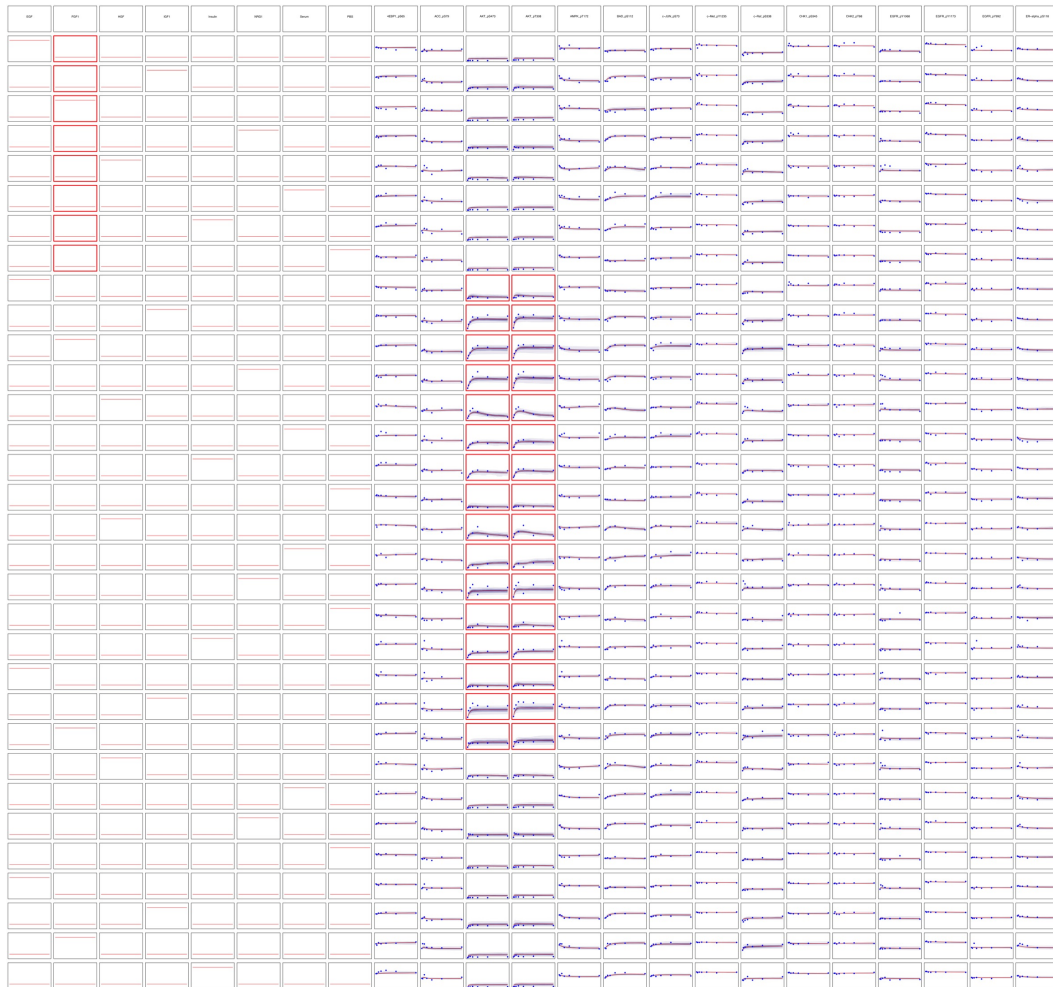

Figure 9: *Ensemble time course trajectories for the case study 4c (DREAMMCF7) (training data, part 1)* The median in red is surrounded by the predicted non-symmetric 20% ,60% and 95%. Blue dots represent the experimental data. Each row is an experiment and each column an observed signal or stimuli. Inhibited signals are surrounded by a red frame and data for these experiments/signals combinations.

## 1.8 Case study 4d (DREAMUACC812)

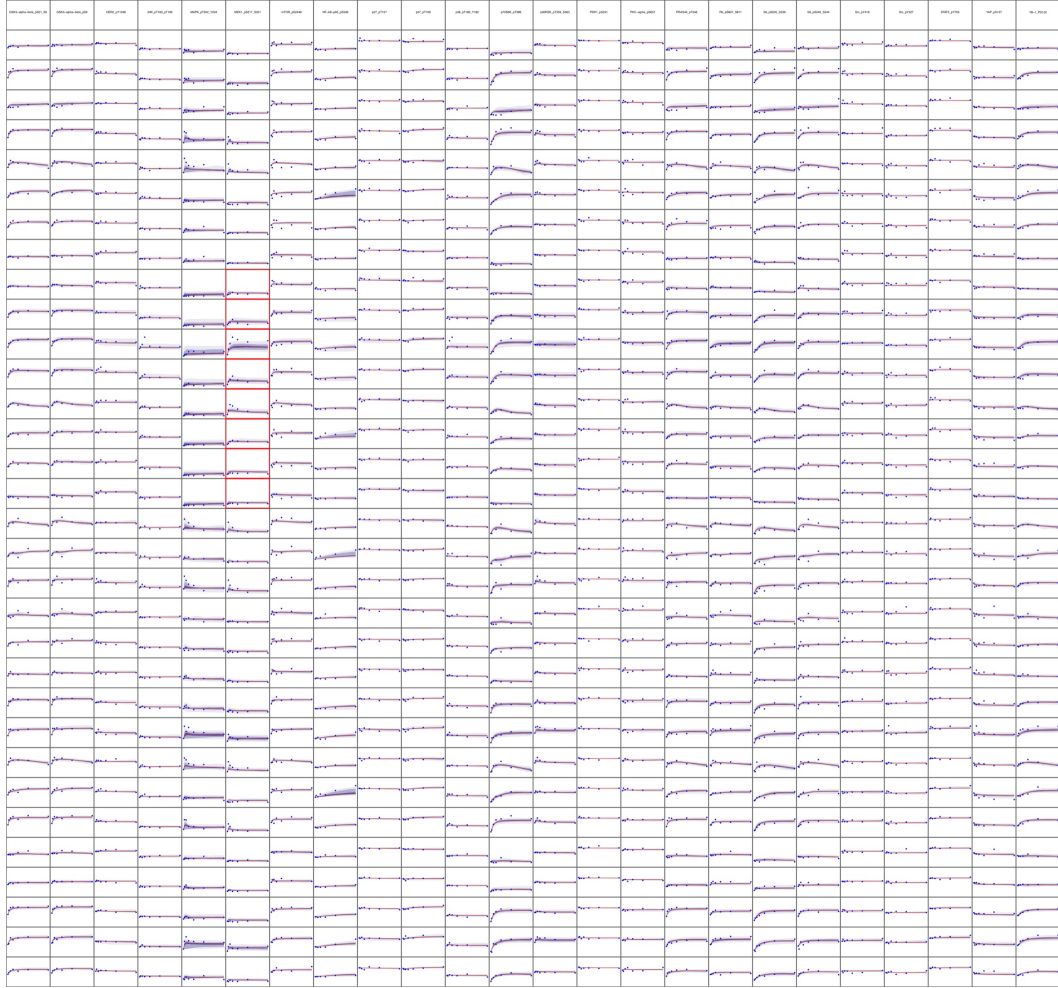

Figure 10: *Ensemble time course trajectories for the case study 4c (DREAMMCF7) (training data, part 2)* The median in red is surrounded by the predicted non-symmetric 20% ,60% and 95%. Blue dots represent the experimental data. Each row is an experiment and each column an observed signal or stimuli. Inhibited signals are surrounded by a red frame and data for these experiments/signals combinations.



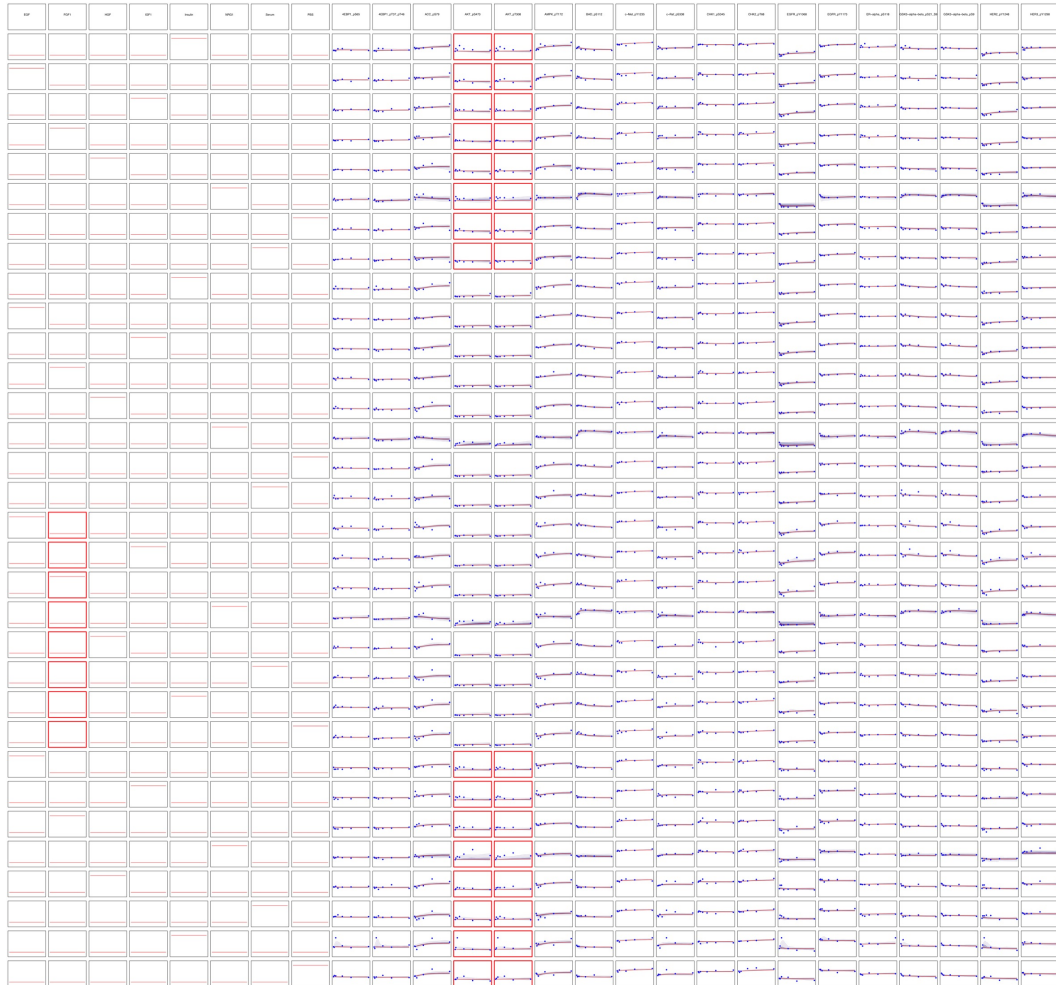

Figure 11: *Ensemble time course trajectories for the case study 4d (DREA-MUACC812) (training data, part 1)* The median in red is surrounded by the predicted non-symmetric 20% ,60% and 95%. Blue dots represent the experimental data. Each row is an experiment and each column an observed signal or stimuli. Inhibited signals are surrounded by a red frame and data for these experiments/signals combinations.

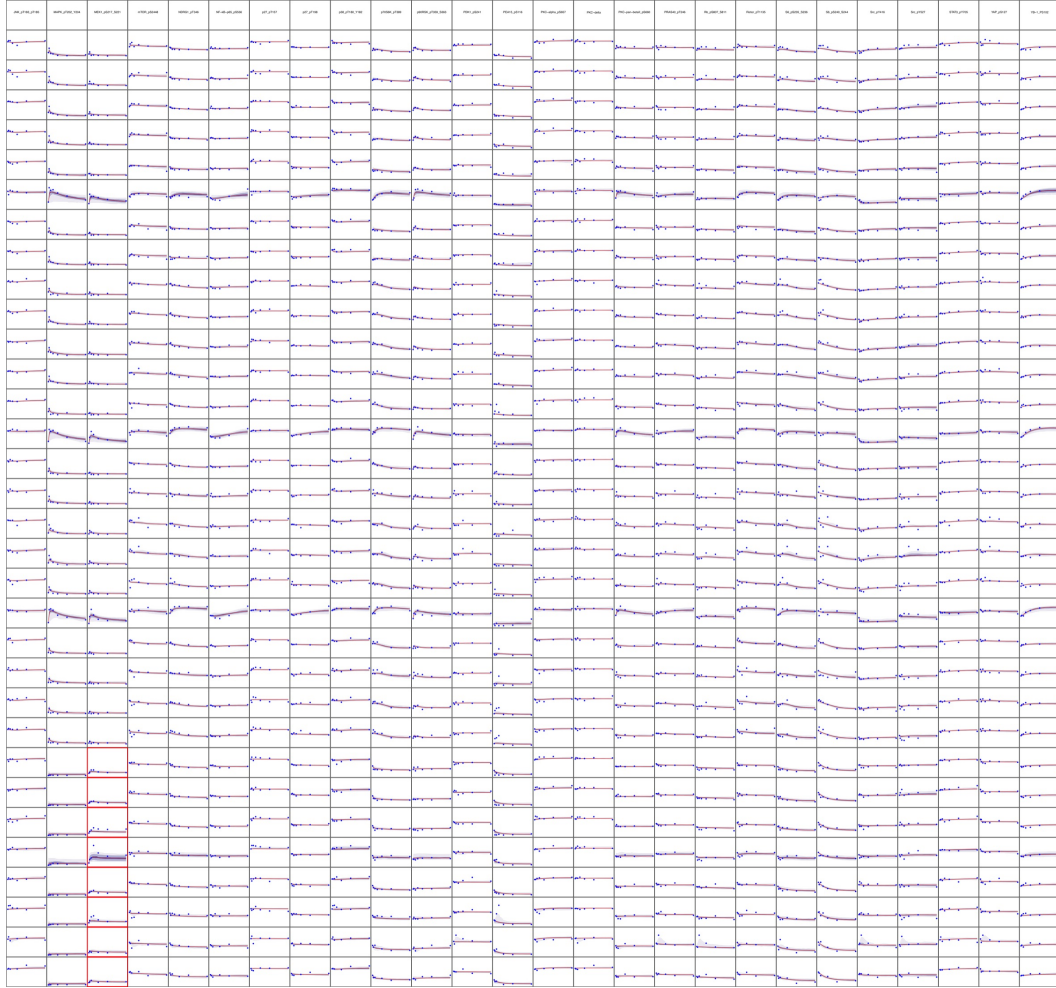

Figure 12: *Ensemble time course trajectories for the case study 4d (DREA-MUACC812) (training data, part 2)* The median in red is surrounded by the predicted non-symmetric 20% ,60% and 95%. Blue dots represent the experimental data. Each row is an experiment and each column an observed signal or stimuli. Inhibited signals are surrounded by a red frame and data for these experiments/signals combinations.
