# Supplementary material for: Data-driven reverse engineering of signaling pathways using ensembles of dynamic models
Source: PubMed Central journal article supplement (PMC5319798; doi:10.1371/journal.pcbi.1005379), 2017-02-06
Supplement: pcbi.1005379.s005.pdf [file pcbi.1005379.s005.pdf]

S5 Text: AUPR score depending on ensemble size  
for different case-studies with and without  
applying model reduction

Data-driven reverse engineering of signaling pathways using  
ensembles of dynamic models

David Henriques, Alejandro F. Villaverde, Miguel Rocha,  
Julio Saez-Rodriguez, Julio R. Banga

January 17, 2017

## Contents

|          |                                                                                                                                 |          |
|----------|---------------------------------------------------------------------------------------------------------------------------------|----------|
| <b>1</b> | <b>Case study 1: AUPR score depending on ensemble size for different case-studies with and without applying model reduction</b> | <b>3</b> |
| 1.1      | Case study 1a (MAPKp) . . . . .                                                                                                 | 3        |
| 1.2      | Case study 1b (MAPKf) . . . . .                                                                                                 | 5        |
| 1.3      | Case study 2 (SSP) . . . . .                                                                                                    | 7        |
| 1.4      | Case study 3 (DREAMiS) . . . . .                                                                                                | 9        |

## List of Figures

|   |                                                                                                    |    |
|---|----------------------------------------------------------------------------------------------------|----|
| 1 | AUPR score depending on ensemble size without model reduction for case study 1a (MAPKp) . . . . .  | 3  |
| 2 | AUPR score depending on ensemble size with model reduction for case study 1a (MAPKp) . . . . .     | 4  |
| 3 | AUPR score depending on ensemble size without model reduction for case study 1b (MAPKf) . . . . .  | 5  |
| 4 | AUPR score depending on ensemble size with model reduction for case study 1b (MAPKf) . . . . .     | 6  |
| 5 | AUPR score depending on ensemble size without model reduction for case study 2 (SSP) . . . . .     | 7  |
| 6 | AUPR score depending on ensemble size with model reduction for case study 2 (SSP) . . . . .        | 8  |
| 7 | AUPR score depending on ensemble size without model reduction for case study 3 (DREAMiS) . . . . . | 9  |
| 8 | AUPR score depending on ensemble size with model reduction for case study 3 (DREAMiS) . . . . .    | 10 |

# 1 Case study 1: AUPR score depending on ensemble size for different case-studies with and without applying model reduction

## 1.1 Case study 1a (MAPKp)

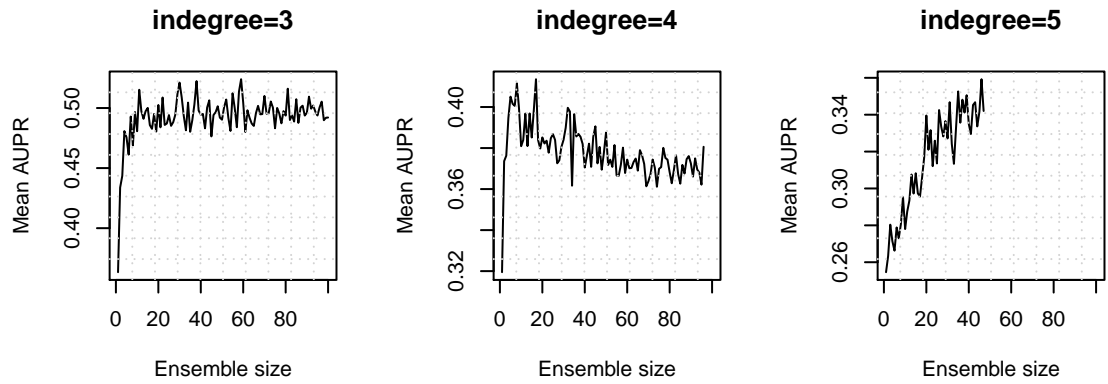

Figure 1:

AUPR score depending on ensemble size without model reduction for case study 1a (MAPKp). Description. This curve was computed by bootstrapping multiple  $n_{\mathcal{M}}$  models from the available models, *i.e.* we sampled multiple realizations of the ensemble network for the same ensemble size and computed the average value.

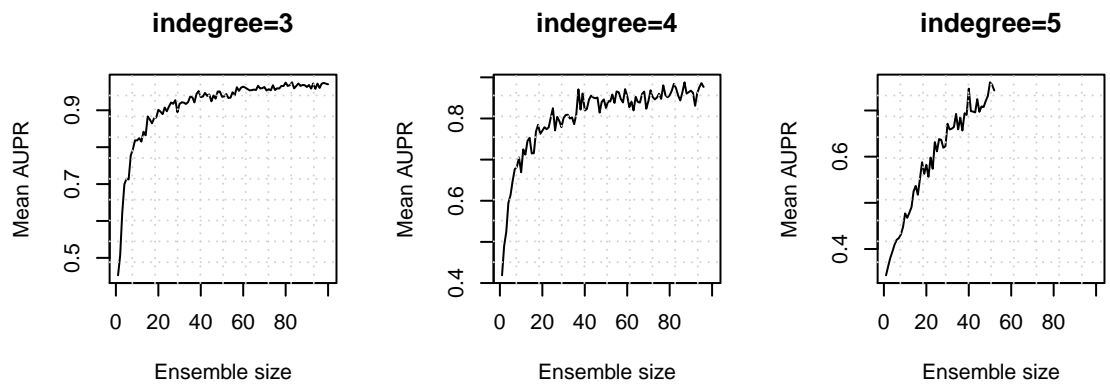

Figure 2:  
 AUPR score depending on ensemble size with model reduction for case study 1a (MAPKp). Description. This curve was computed by bootstrapping multiple  $n_{\mathcal{M}}$  models from the available models, *i.e.* we sampled multiple realizations of the ensemble network for the same ensemble size and computed the average value.

## 1.2 Case study 1b (MAPKf)

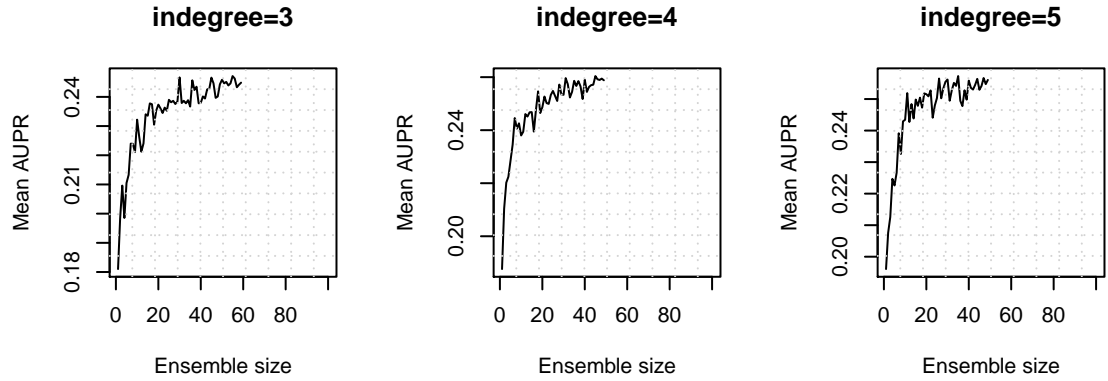

Figure 3:

AUPR score depending on ensemble size without model reduction for case study 1b (MAPKf). Description. This curve was computed by bootstrapping multiple  $n_{\mathcal{M}}$  models from the available models, *i.e.* we sampled multiple realizations of the ensemble network for the same ensemble size and computed the average value.

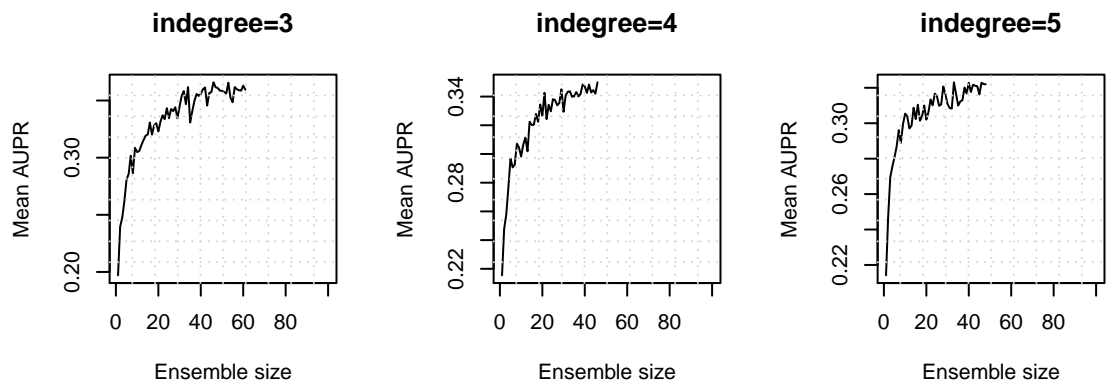

Figure 4:  
 AUPR score depending on ensemble size with model reduction for case study 1b (MAPKf). Description. This curve was computed by bootstrapping multiple  $n_{\mathcal{M}}$  models from the available models, *i.e.* we sampled multiple realizations of the ensemble network for the same ensemble size and computed the average value.

### 1.3 Case study 2 (SSP)

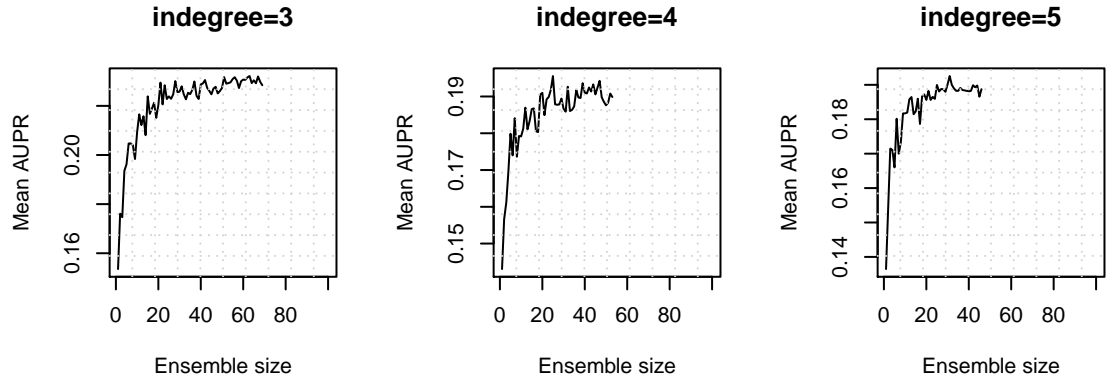

Figure 5:

AUPR score depending on ensemble size without model reduction for case study 2 (SSP). Description. This curve was computed by bootstrapping multiple  $n_{\mathcal{M}}$  models from the available models, *i.e.* we sampled multiple realizations of the ensemble network for the same ensemble size and computed the average value.

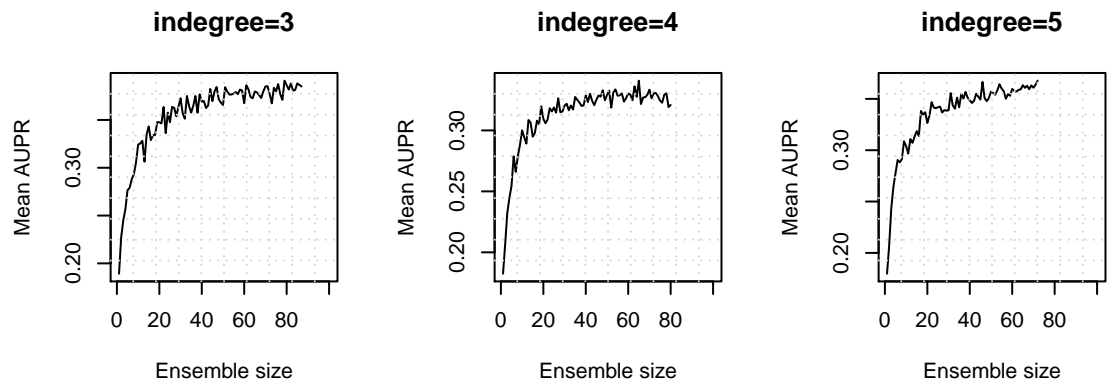

Figure 6:  
 AUPR score depending on ensemble size with model reduction for case study 2 (SSP). Description. This curve was computed by bootstrapping multiple  $n_M$  models from the available models, *i.e.* we sampled multiple realizations of the ensemble network for the same ensemble size and computed the average value.



### 1.4 Case study 3 (DREAMiS)

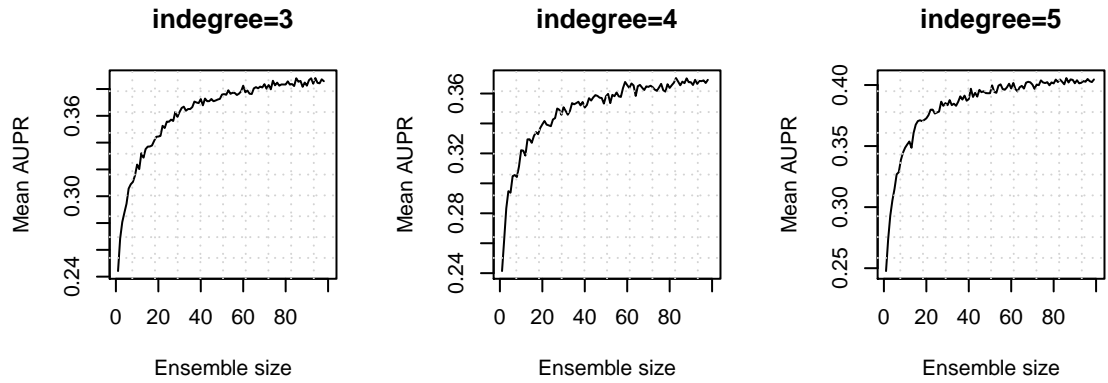

Figure 7:

AUPR score depending on ensemble size without model reduction for case study 3 (DREAMiS). Description. This curve was computed by bootstrapping multiple  $n_{\mathcal{M}}$  models from the available models, *i.e.* we sampled multiple realizations of the ensemble network for the same ensemble size and computed the average value.

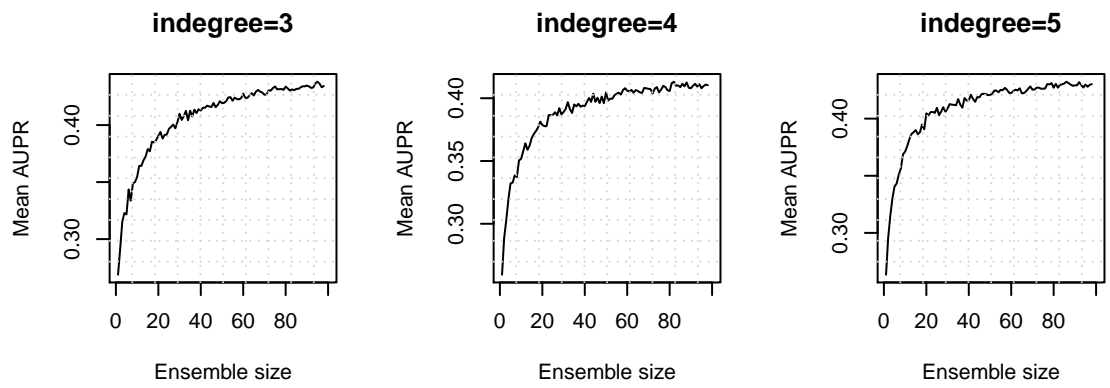

Figure 8:

AUPR score depending on ensemble size without model reduction for case study 3 (DREAMiS). Description. This curve was computed by bootstrapping multiple  $n_{\mathcal{M}}$  models from the available models, *i.e.* we sampled multiple realizations of the ensemble network for the same ensemble size and computed the average value.
