# Supplementary material for: Data-driven reverse engineering of signaling pathways using ensembles of dynamic models
Source: PubMed Central journal article supplement (PMC5319798; doi:10.1371/journal.pcbi.1005379), 2017-02-06
Supplement: pcbi.1005379.s006.pdf [file pcbi.1005379.s006.pdf]

S6 Text: AUPR curves of different inference  
methods and case-studies  
Data-driven reverse engineering of signaling pathways using  
ensembles of dynamic models

David Henriques, Alejandro F. Villaverde, Miguel Rocha,  
Julio Saez-Rodriguez, Julio R. Banga

January 17, 2017

## Contents

|          |                                                              |          |
|----------|--------------------------------------------------------------|----------|
| <b>1</b> | <b>AUPR curves for different algorithms and case-studies</b> | <b>3</b> |
| 1.1      | Case study 1a (MAPKp) . . . . .                              | 3        |
| 1.2      | Case study 1b (MAPKf) . . . . .                              | 4        |
| 1.3      | Case study 2 (SSP) . . . . .                                 | 5        |
| 1.4      | Case study 3 (DREAMiS) . . . . .                             | 6        |

## List of Figures

|   |                                                                                 |   |
|---|---------------------------------------------------------------------------------|---|
| 1 | AUPR curves of different inference methods for case study 1a (MAPKp) . . . . .  | 3 |
| 2 | AUPR curves of different inference methods for case study 1b (MAPKf) . . . . .  | 4 |
| 3 | AUPR curves of different inference methods for case study 2 (SSP) . . . . .     | 5 |
| 4 | AUPR curves of different inference methods for case study 3 (DREAMiS) . . . . . | 6 |

# 1 AUPR curves for different algorithms and case-studies

## 1.1 Case study 1a (MAPKp)

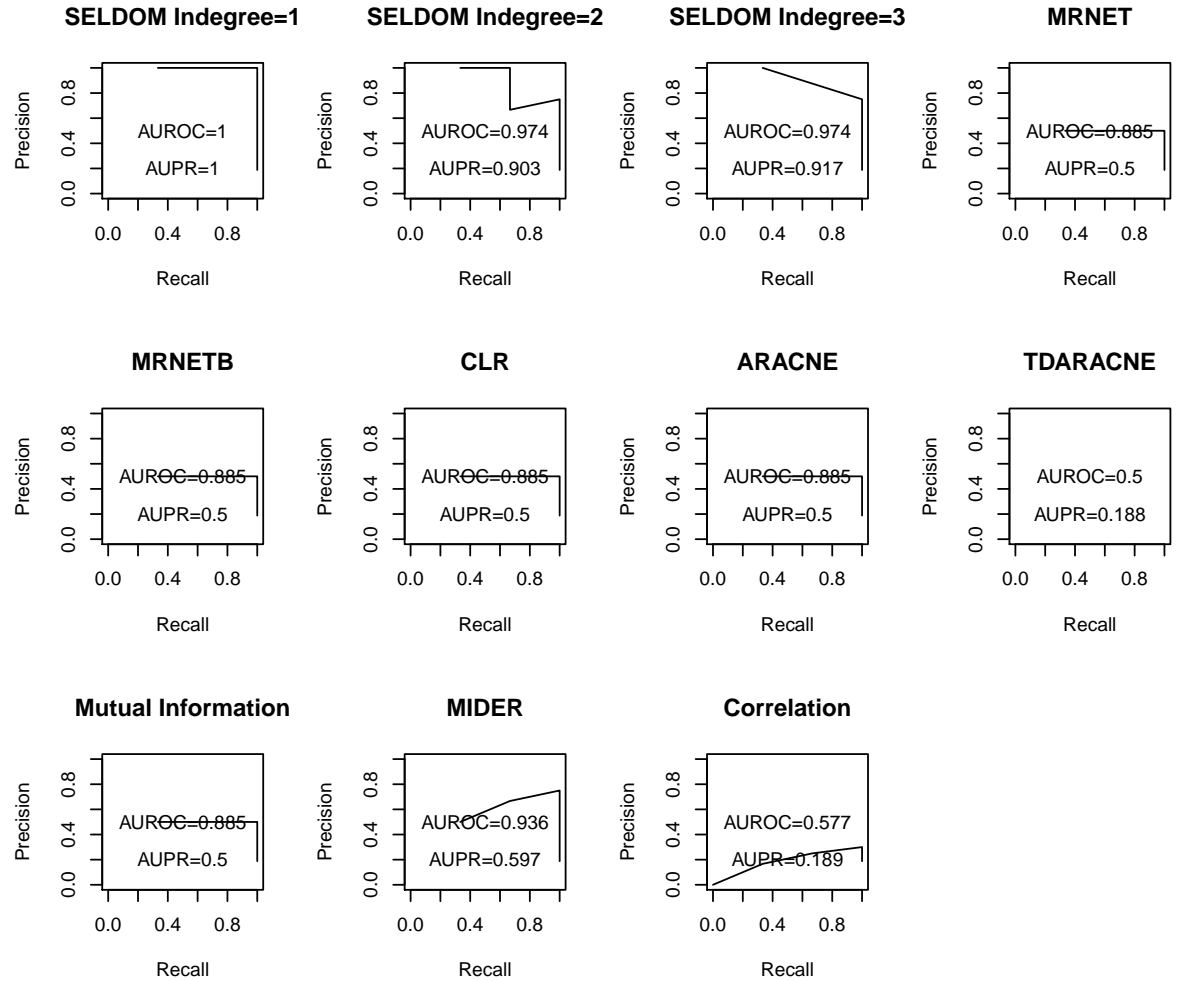

Figure 1: *AUPR curves of different inference methods for case study 1a (MAPKp).*

## 1.2 Case study 1b (MAPKf)

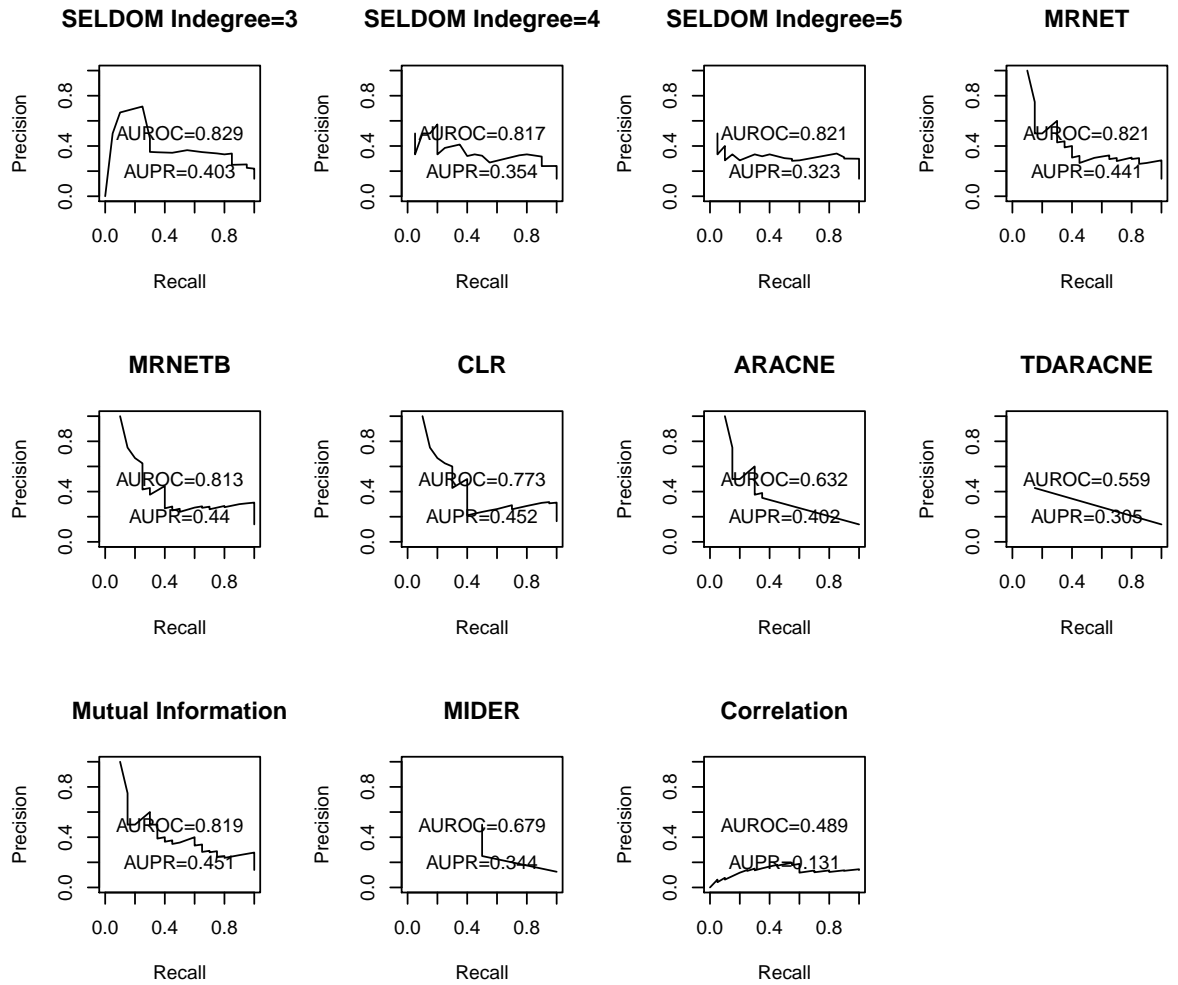

Figure 2: *AUPR curves of different inference methods for case study 1b (MAPKf).*

### 1.3 Case study 2 (SSP)

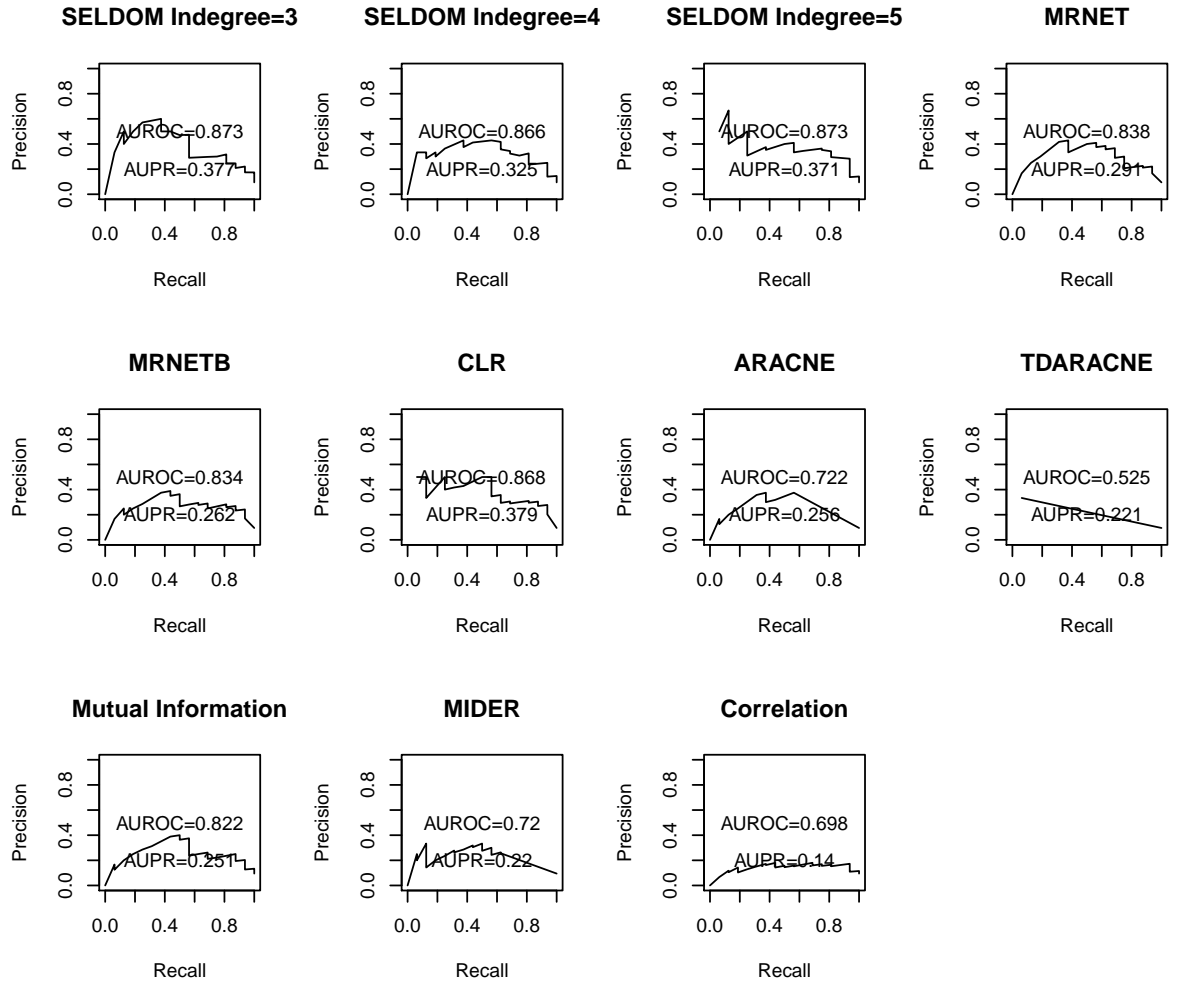

Figure 3: *AUPR curves of different inference methods for case study 2 (SSP).*

## 1.4 Case study 3 (DREAMiS)

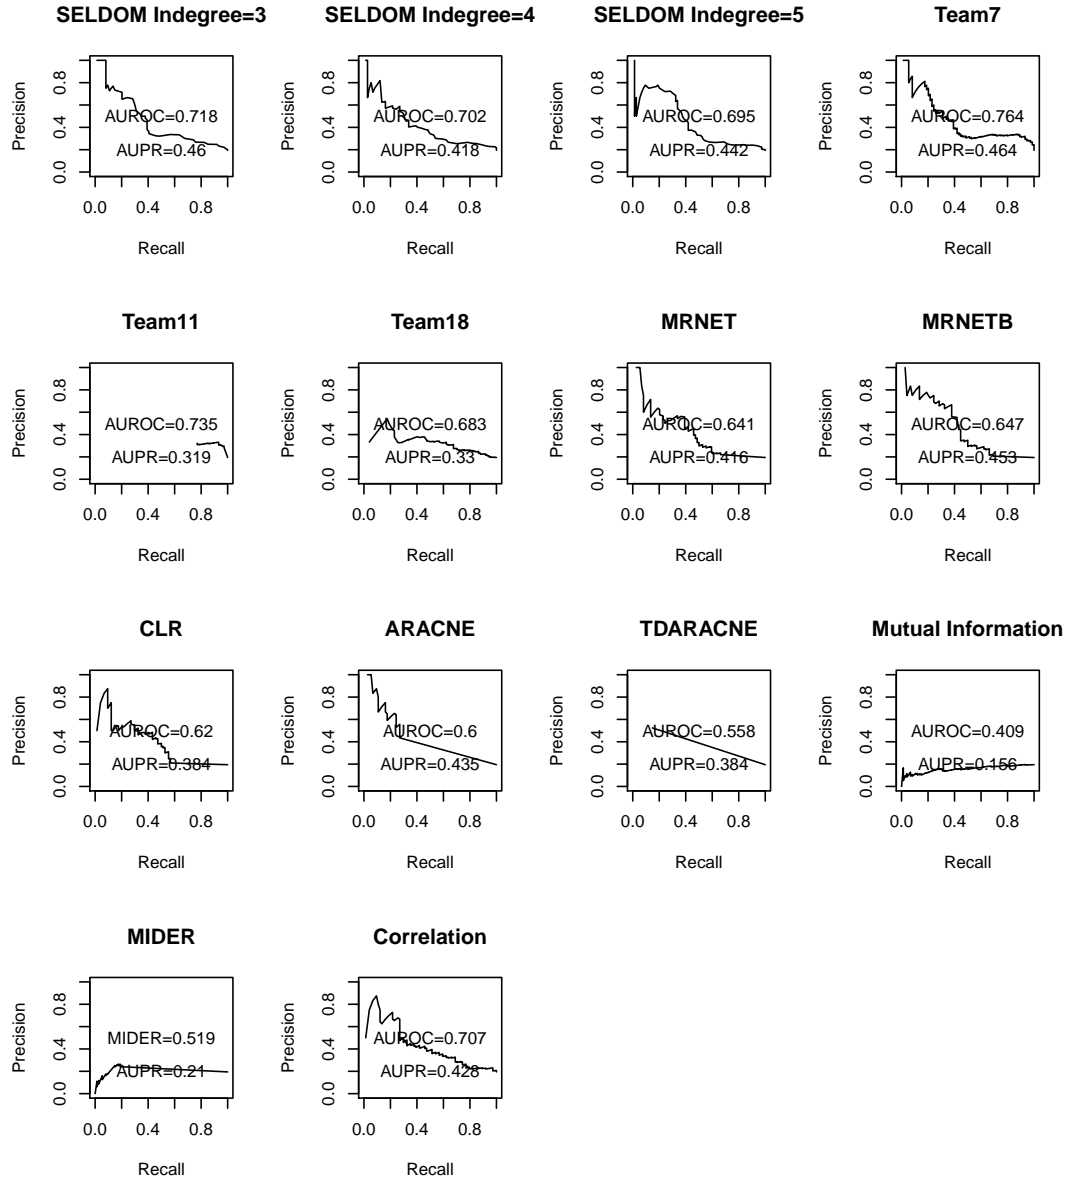

Figure 4: *AUPR* curves of different inference methods for case study 3 (*DREAMiS*).
